# Supplementary material for: Computational modeling suggests binding-induced expansion of Epsin disordered regions upon association with AP2
Source: PLOS journal article supplement (doi:10.1371/journal.pcbi.1008474), 2021-01-06
Supplement: S11 (10.1371/journal.pcbi.1008474.s011) [file journal.pcbi.1008474.s011]

**S11. Distances between sequentially adjacent AP2-binding motifs in Epsin and Eps15 across species.**

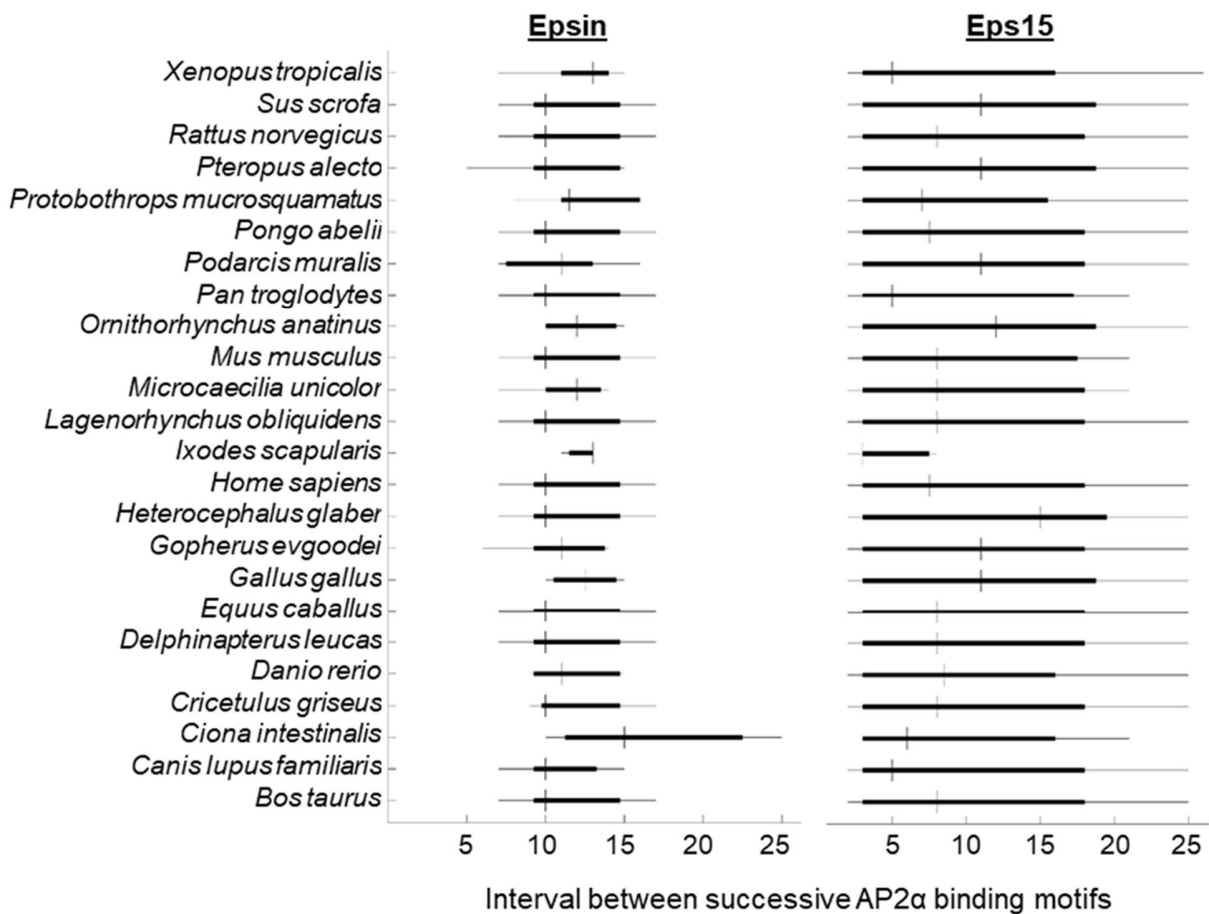

**Figure S11.1** Distribution of the intervals between adjacent AP2 $\alpha$  binding motifs in Epsin (*left*) and Eps15 (*right*) in multiple species. Thick black horizontal lines represent the inter-quartile range and the vertical black lines represent the median distance between adjacent binding motifs.
